# Supplementary material
Source: Elsevier journal article supplement (https://www.sciencedirect.com/science/article/pii/S0211139X16301123)
Supplement: mmc1 [file S0211139X16301123:mmc1.pdf]

## ANEXO 1

| ENFERMEDAD                                              | CRITERIOS DE SEVERIDAD / PROGRESIÓN                                                                                                                                                                                                                                                                                                                                                                                                                                                                            |
|---------------------------------------------------------|----------------------------------------------------------------------------------------------------------------------------------------------------------------------------------------------------------------------------------------------------------------------------------------------------------------------------------------------------------------------------------------------------------------------------------------------------------------------------------------------------------------|
| Enfermedad oncológica                                   | <ul style="list-style-type: none"> <li>Diagnóstico confirmado de <b>cáncer metastásico</b> (estadio IV) o estadio III con escasa respuesta o contraindicación de tratamiento específico (en tumores sólidos)</li> <li><b>Síntomas persistentes</b> mal controlados o refractarios a pesar de optimizar el tratamiento específico.</li> </ul>                                                                                                                                                                   |
| Enfermedad pulmonar crónica                             | <ul style="list-style-type: none"> <li><b>Disnea</b> de reposo o de mínimos esfuerzos entre exacerbaciones</li> <li><b>Criterios espirométricos</b> de obstrucción severa (VEMS &lt;30%) o criterios de déficit restrictivo severo (CV forzada &lt;40% / DLCO &lt;40%)</li> <li><b>Criterios gasométricos</b> basales de oxigenoterapia crónica domiciliaria.</li> <li><b>Insuficiencia cardíaca sintomática</b> asociada</li> </ul>                                                                           |
| Enfermedad cardíaca crónica                             | <ul style="list-style-type: none"> <li><b>Disnea</b> de reposo o de mínimos esfuerzos entre exacerbaciones</li> <li><b>Insuficiencia cardíaca</b> NYHA estadio III ó IV, <b>enfermedad valvular</b> severa no quirúrgica o <b>enfermedad coronaria</b> no re-vascularizable</li> <li><b>Ecocardiografía</b> basal: FE &lt;30% o HTAP severa (PAPs &gt; 60)</li> <li><b>Insuficiencia renal</b> asociada (FG &lt;30 l / min)</li> <li>Asociación con insuficiencia renal e hiponatremia persistente.</li> </ul> |
| Enfermedad neurológica vascular (ictus)                 | <ul style="list-style-type: none"> <li><b>Durante la fase aguda y subaguda</b> (&lt;3 meses post-ictus): estado vegetativo persistente o de mínima conciencia &gt; 3 días</li> <li><b>Durante la fase crónica</b> (&gt; 3 meses post-ictus): complicaciones médicas repetidas (o demencia con criterios de severidad post-ictus)</li> </ul>                                                                                                                                                                    |
| Enfermedad neurológica degenerativa: ELA, EM, Parkinson | <ul style="list-style-type: none"> <li><b>Deterioro progresivo</b> de la función física y / o cognitivas</li> <li><b>Síntomas</b> complejos y difíciles de controlar</li> <li><b>Disfagia</b> / trastorno del habla persistente</li> <li><b>Neumonía</b> por aspiración recurrente, disnea o insuficiencia respiratoria</li> </ul>                                                                                                                                                                             |
| Enfermedad hepática crónica                             | <ul style="list-style-type: none"> <li><b>Cirrosis avanzada</b> estadio Child C (determinado fuera de complicaciones o habiéndolas tratado y optimizado el tratamiento), MELD-Na &gt; 30 o ascitis refractaria, síndrome hepatorenal o hemorragia digestiva alta por hipertensión portal persistente a pesar de optimizar tratamiento.</li> <li><b>Carcinoma hepatocelular</b> en estadio C o D</li> </ul>                                                                                                     |
| Insuficiencia renal crónica                             | <ul style="list-style-type: none"> <li><b>Insuficiencia renal grave</b> (FG &lt;15) en pacientes no candidatos a tratamiento sustitutivo y / o trasplante</li> </ul>                                                                                                                                                                                                                                                                                                                                           |

**Anexo 1:** Criterios de enfermedad crónica avanzada según los criterios de severidad y progresión NECPAL. **CV:** Capacidad vital. **DLCO:** capacidad de difusión de monóxido de carbono. **ELA:** Esclerosis lateral amiotrófica. **EM:** Esclerosis múltiple. **FE:** Fracción de eyección. **FG:** Filtrado glomerular. **HTAP:** Hipertensión arterial pulmonar. **NYHA:** New York Heart Association. **PAPs:** Presión media de la arteria pulmonar. **VEMS:** volumen espirado máximo en el primer segundo de la espiración forzada.

## ANEXO 2

|                       |      | ÍNDICES DE FRAGILIDAD |                       |              |                        |             |
|-----------------------|------|-----------------------|-----------------------|--------------|------------------------|-------------|
| DOMINIO               |      | CSHA-FI <sup>70</sup> | CSHA-FI <sup>40</sup> | FI-CGA       | SHARE-FI <sup>40</sup> | IF-VIG      |
| Funcional             | AIVD | n=4<br>6 %            | n=5<br>12,5 %         | n=6<br>12 %  | n=5<br>12,5 %          | n=3<br>12 % |
|                       | ABVD | n=7<br>10 %           | n=10<br>25 %          | n=9<br>17 %  | n=9<br>22,5 %          | n=3<br>12 % |
| Nutricional           |      | -                     | n=2<br>5 %            | n=1<br>2 %   | n=2<br>5 %             | n=1<br>3 %  |
| Cognitivo             |      | n=9<br>13 %           | n=1<br>2,5 %          | n=1<br>2 %   | n=1<br>2,5 %           | n=3<br>12 % |
| Emocional             |      | n=7<br>10 %           | n=3<br>7,5 %          | n=2<br>4 %   | n=3<br>7,5 %           | n=2<br>8 %  |
| Social                |      | -                     | -                     | -            | -                      | n=1<br>3 %  |
| Síndromes Geriátricos |      | n=5<br>7 %            | -                     | n=7<br>13 %  | n=2<br>5 %             | n=4<br>16 % |
| Síntomas              |      | -                     | -                     | n=1<br>2 %   | n=1<br>2,5 %           | n=2<br>8 %  |
| Enfermedades crónicas |      | n=15<br>21 %          | n=8<br>20 %           | n=11<br>21 % | n=10<br>25 %           | n=6<br>26 % |
| Otros                 |      | n=23<br>33 %          | n=11<br>27,5 %        | n=14<br>27 % | n=7<br>17,5 %          | -           |
| TOTAL DÉFICITS        |      | x/70                  | x/40                  | x/52         | x/40                   | x/25        |

**Anexo 2.** Distribución de déficits por dominios en distintos índices de fragilidad (en porcentajes, sin contabilizar el dominio “otros”). **ABVD:** Actividades básicas de la vida diaria. **AIVD:** Actividades instrumentales de la vida diaria. **CSHA-FI:** Canadian Study of Health and Aging–Frailty Index; version original con 70 variables<sup>12</sup> y version posterior con 40 variables<sup>13</sup>. **FI-CGA:** Frailty Index –Comprehensive Geriatric Assessment. **SHARE-FI**<sup>14</sup>: SHARE (Survey of Health, Ageing and Retirement in Europe)-Frailty Index.

### ANEXO 3

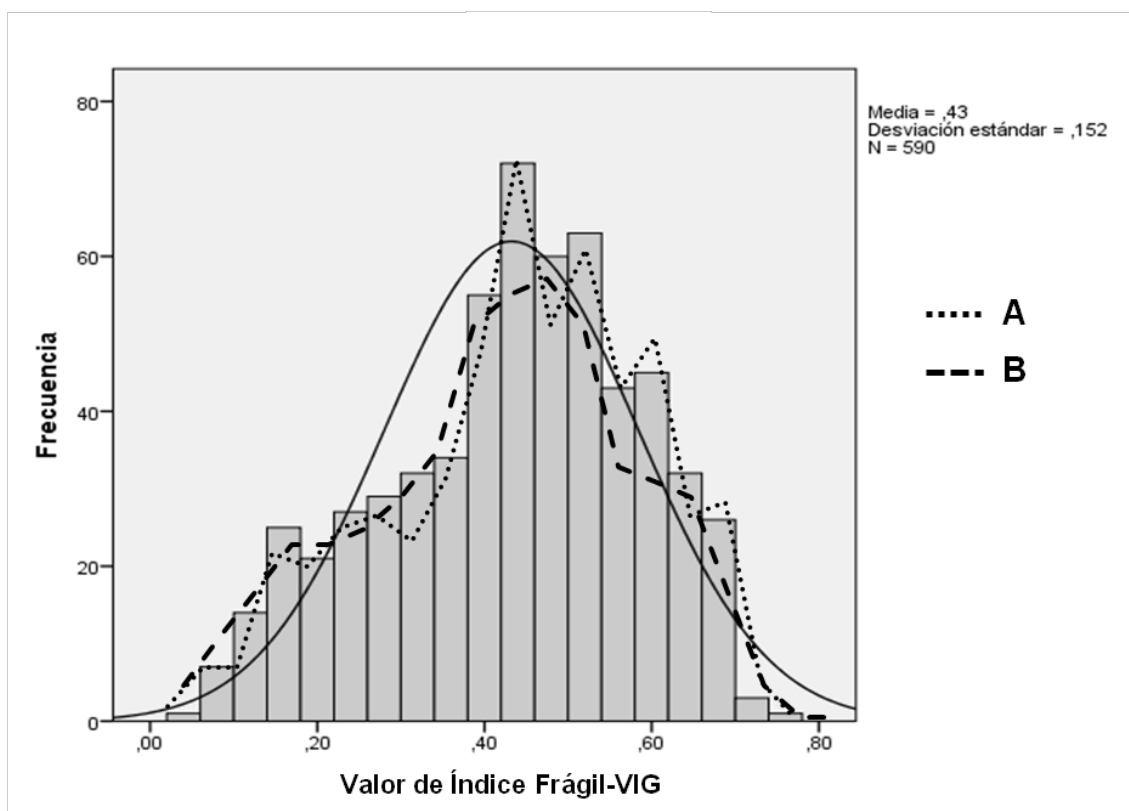

**Anexo 3.** Distribución asimétrica de la puntuación del Índice Frágil-VIG en la cohorte analizada. *No existen diferencias en la distribución de la puntuación entre los dos subgrupos aleatorizados (A y B).*

## ANEXO 4

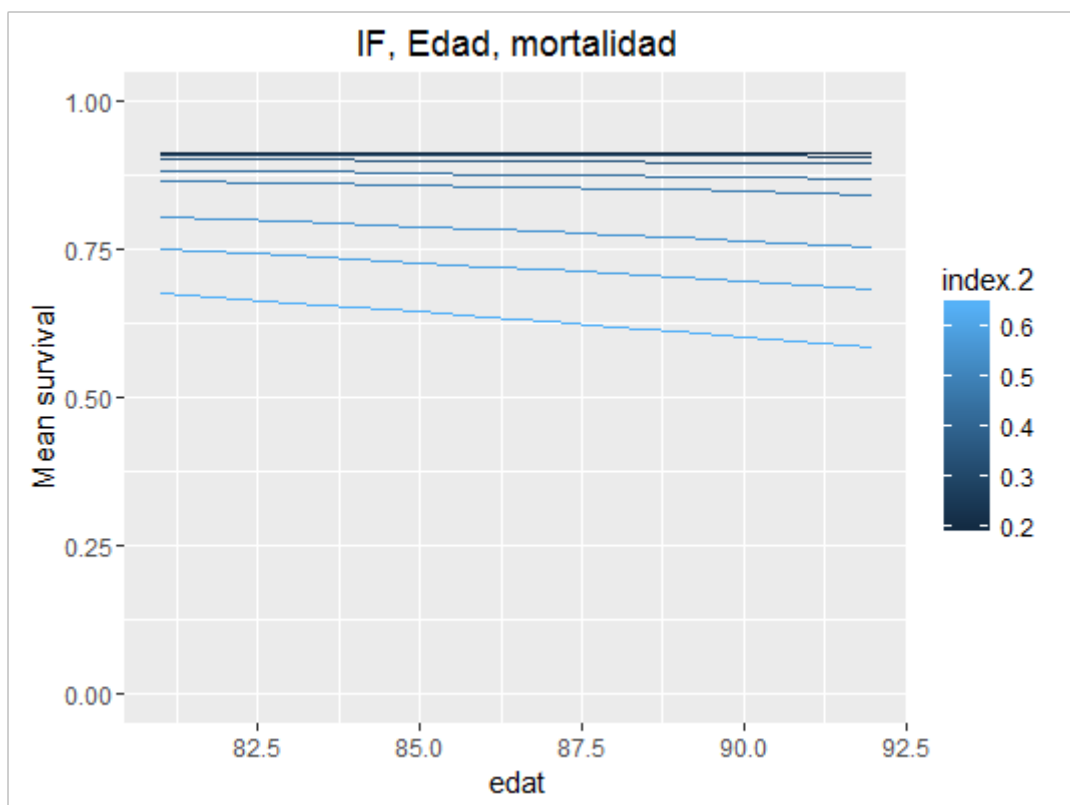

**Anexo 4.** Relación entre edad, Índice Frágil-VIG y mortalidad. Para pacientes con índice de fragilidad bajo, prácticamente no existen variaciones en la mortalidad independientemente de la edad. A medida que aumenta el índice de fragilidad, a igualdad de índice de fragilidad la mortalidad tiende a aumentar con la edad.
